# Supplementary material for: Interfacial hybridization of Janus MoSSe and BX (X = P, As) monolayers for ultrathin excitonic solar cells, nanopiezotronics and low-power memory devices
Source: Royal Society of Chemistry journal article supplement (doi:10.1039/d0nr07000a), 2020-01-01
Supplement: d0nr07000a1.pdf [file d0nr07000a1.pdf]

## **Electronic Supplementary Information (ESI)**

### **Interfacial hybridization of Janus MoSSe and BX (X= P, As) monolayers for ultrathin excitonic solar cell, nanopiezotronics and low-power memory devices**

Manish Kumar Mohanta and Abir De Sarkar\*

Institute of Nano Science and Technology, Phase 10, Sector 64, Mohali, Punjab-160062, India

\*E-mail: abir@inst.ac.in; abirdesarkar@gmail.com

#### **Formalism:**

**Mechanical constants:** 2D layer modulus:  $\gamma^{2D} = \frac{1}{2}[C_{11} + C_{12}]$  (1)

Young's modulus ( $Y$ ) =  $\frac{C_{11}^2 - C_{12}^2}{C_{11}}$  (2)

Poisson ratio ( $\nu$ ) =  $C_{12}/C_{11}$  (3)

Shear modulus ( $G$ ) =  $C_{66}$  (4)

Intrinsic strength  $\sigma_{int} \sim \frac{Y}{9}$  (5)

Bending modulus  $D = \frac{Yh^2}{12(1-\nu^2)}$  (6), where  $h$  is the thickness of the nanosheet ( $\sim 7.35\text{\AA}$ )

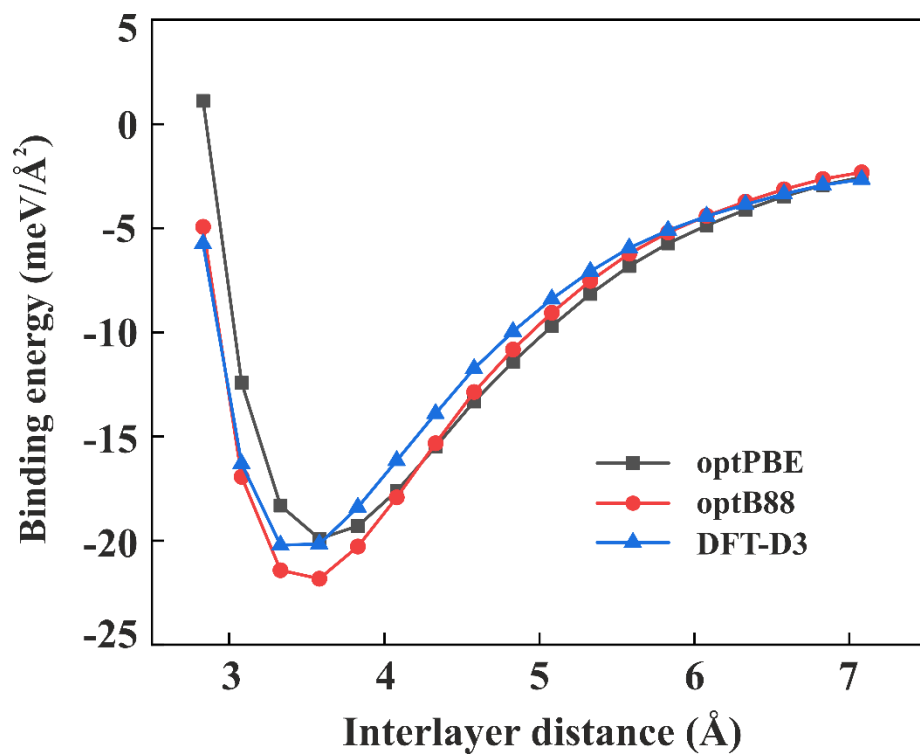

Figure S1. Interlayer distance vs binding energy curve of BP/MoSSe using different van der Waals correction

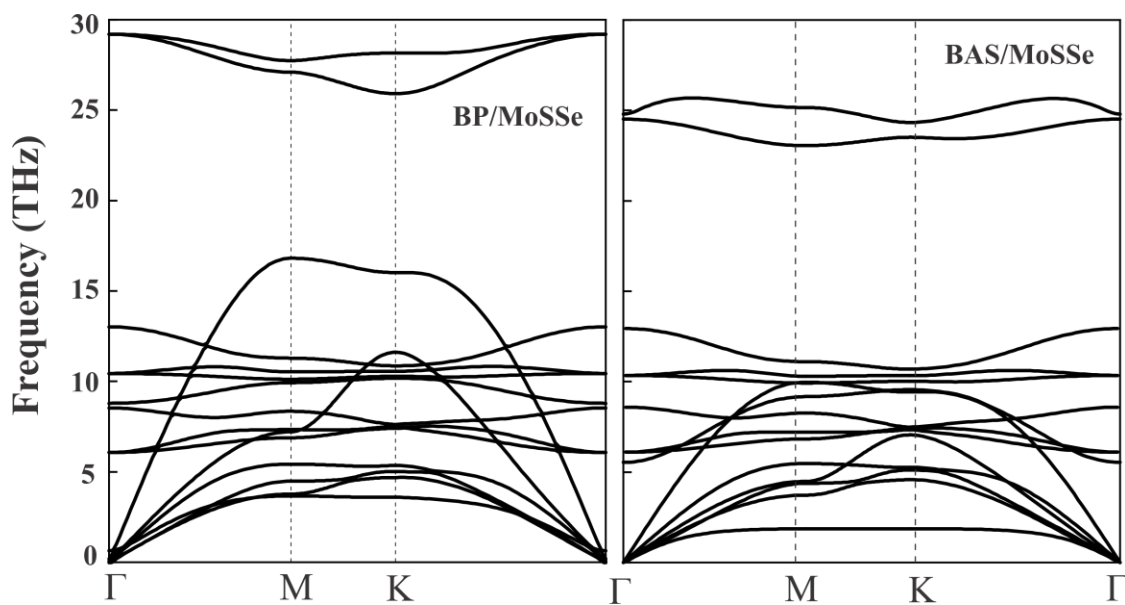

Figure S2. Phonon dispersion curve of BX/MoSSe vdWHs.

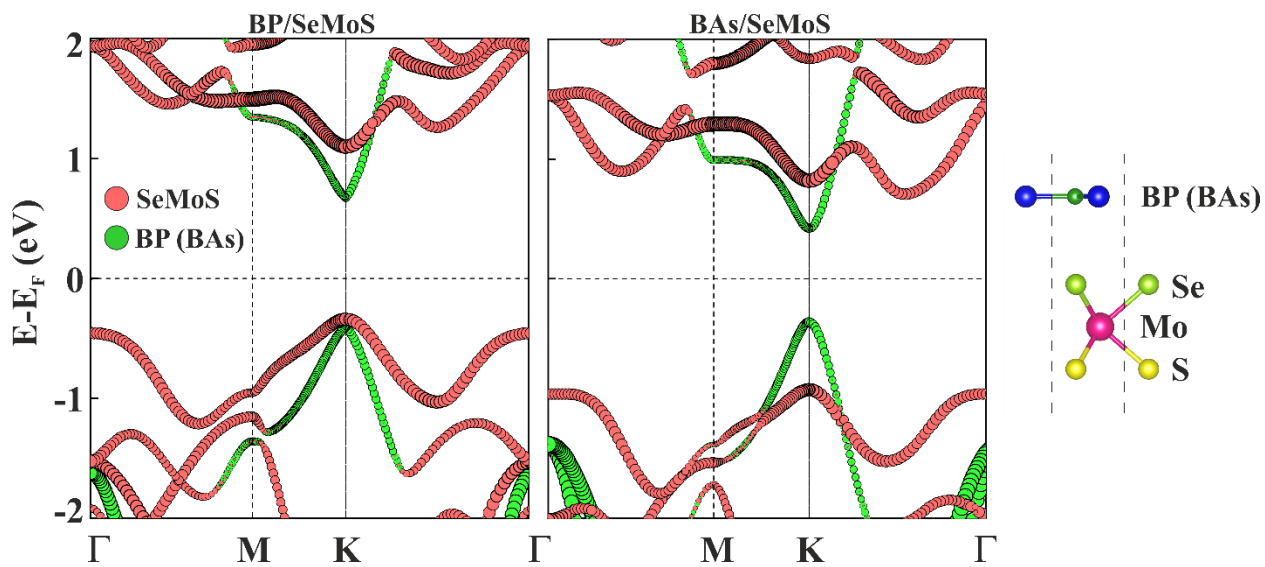

Figure S3. Electronic band structure of BP(BAs)/SeMoS heterostructure calculated using GGA-PBE

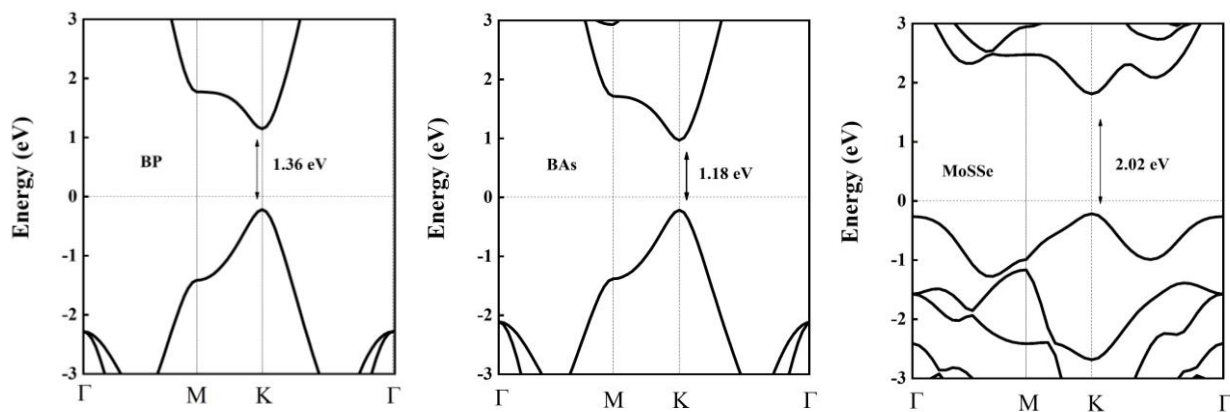

Figure S4. The electronic band structure of individual monolayers calculated using HSE06.

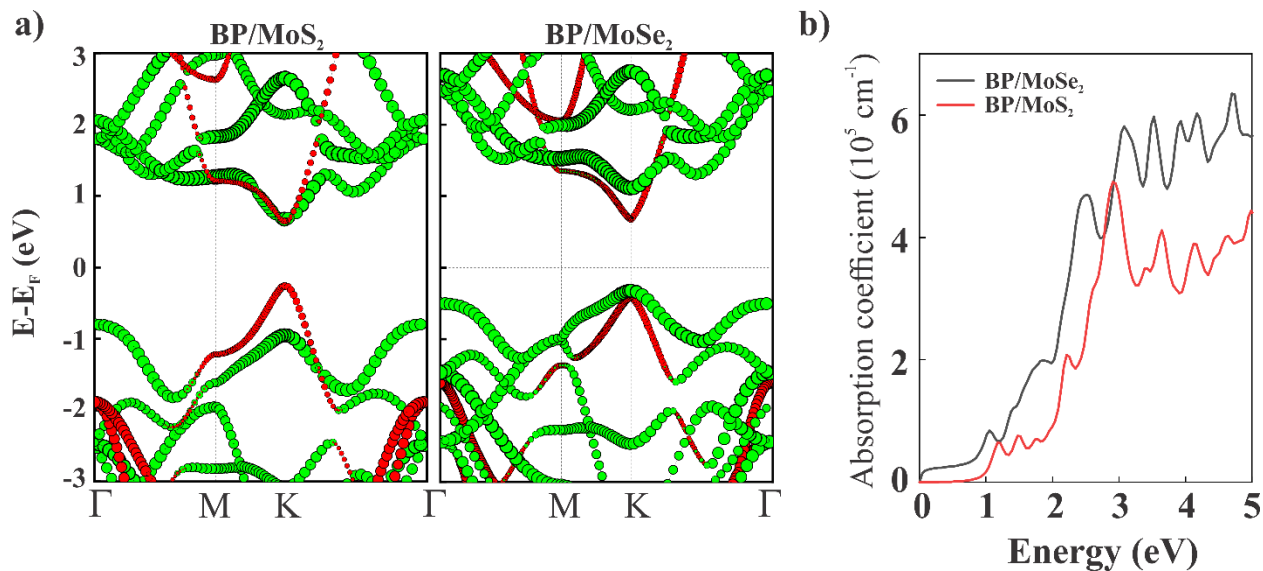

Figure S5. Electronic band structure of BP/MoS<sub>2</sub> and BP/MoSe<sub>2</sub> vdWH and their absorption coefficient

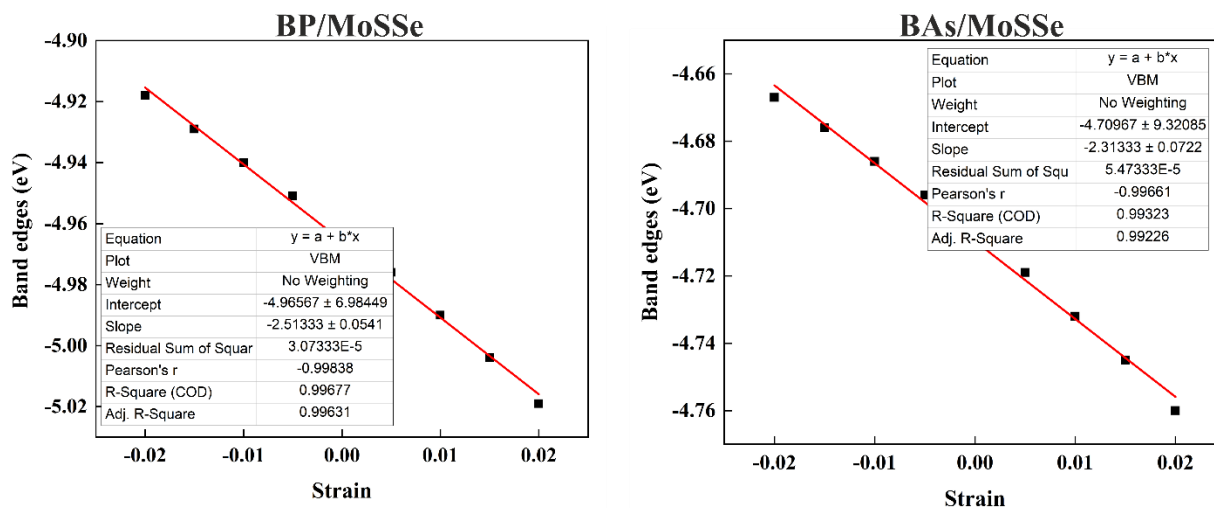

Figure S6. Deformation potential of holes calculated for BX/MoSSe vdWH

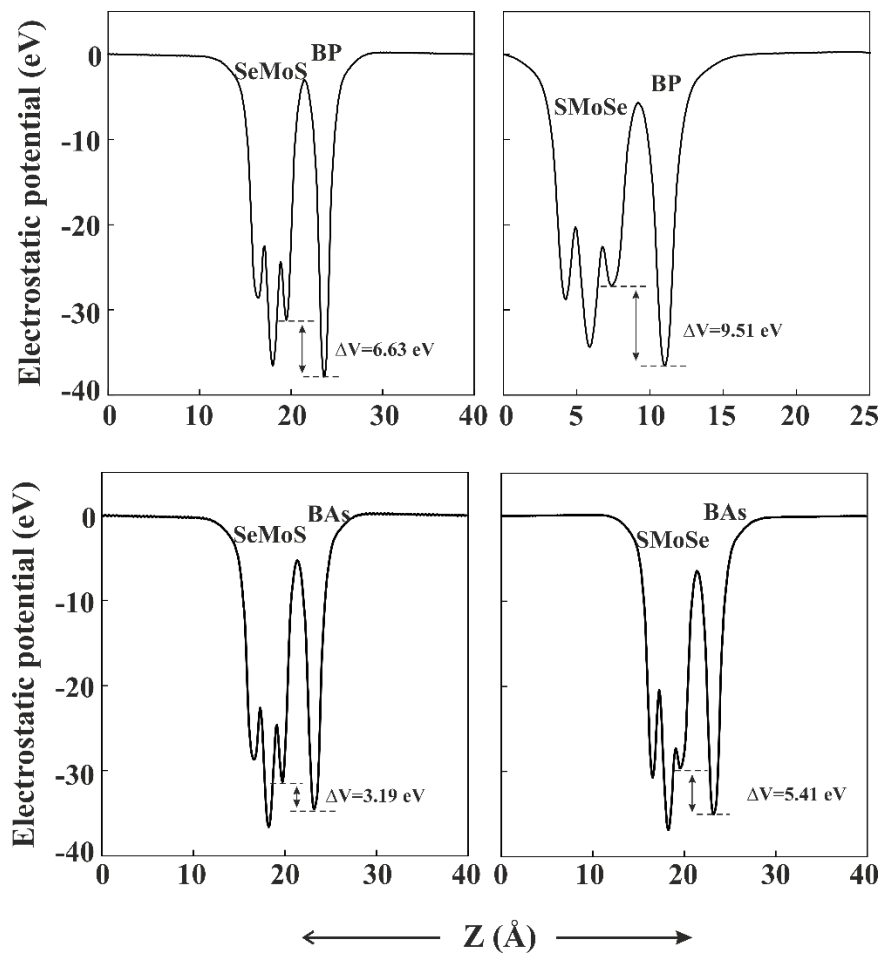

Figure S7. Electrostatic potential energy profile of different vdWHs.

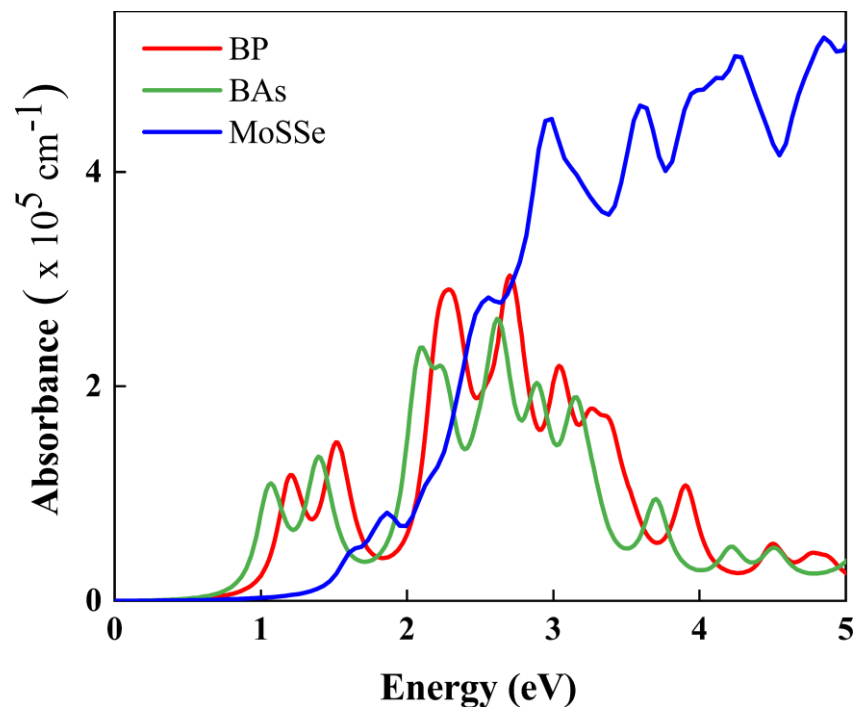

Figure S8. The optical absorption spectra of monolayers.

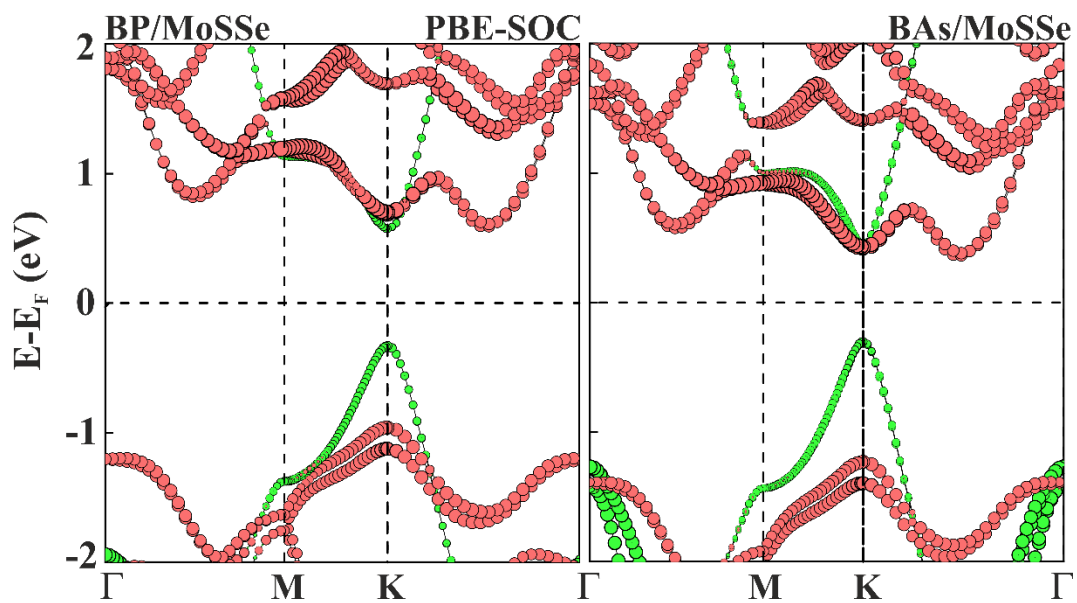

Figure S9. The electronic band structure of BX/MoSSe including SOC

| <b>Table-S1 Calculated relaxed ion (Electronic + Ionic) piezoelectric tensor <math>e_{ij}</math> (unit: C/m<sup>2</sup>) and total elastic modulus <math>C_{ij}</math> (unit: GPa) of BP/MoSSe and BAs/MoSSe heterobilayer</b> |          |          |          |          |          |          |          |
|--------------------------------------------------------------------------------------------------------------------------------------------------------------------------------------------------------------------------------|----------|----------|----------|----------|----------|----------|----------|
| $e_{ij}$                                                                                                                                                                                                                       |          |          |          | $C_{ij}$ |          |          |          |
| <b>BP/MoSSe</b>                                                                                                                                                                                                                |          |          |          |          |          |          |          |
|                                                                                                                                                                                                                                | <b>1</b> | <b>2</b> | <b>3</b> |          | <b>1</b> | <b>2</b> | <b>3</b> |
| <b>1</b>                                                                                                                                                                                                                       | -0.00134 | -0.00108 | 0.00012  | <b>1</b> | 70.67    | 17.95    | 0.21     |
| <b>2</b>                                                                                                                                                                                                                       | 0.0349   | -0.03354 | -0.0001  | <b>2</b> | 17.95    | 69.8     | -0.29    |
| <b>3</b>                                                                                                                                                                                                                       | -0.01104 | -0.01104 | -0.01583 | <b>3</b> | 0.216    | -0.293   | 1.06     |
| <b>BAs/MoSSe</b>                                                                                                                                                                                                               |          |          |          |          |          |          |          |
|                                                                                                                                                                                                                                | <b>1</b> | <b>2</b> | <b>3</b> |          | <b>1</b> | <b>2</b> | <b>3</b> |
| <b>1</b>                                                                                                                                                                                                                       | 0.00738  | 0.00053  | 0.00096  | <b>1</b> | 66.245   | 15.60    | -0.088   |
| <b>2</b>                                                                                                                                                                                                                       | 0.04618  | -0.05079 | -0.0006  | <b>2</b> | 15.60    | 66.36    | -0.152   |
| <b>3</b>                                                                                                                                                                                                                       | -0.00021 | -0.00022 | -0.01086 | <b>3</b> | -0.0885  | -0.152   | 1.423    |

Note that the total elastic modulus  $C_{ij}$  is calculated with a high dense k-mesh of  $16 \times 16 \times 1$  and higher energy cut-off of 700 eV, as suggested by VASP. The piezoelectric coefficients ( $d_{21}$ ) of BP, BAs have been calculated<sup>1</sup> to be 1.81 pm/V and 2.3 pm/V respectively which are in excellent agreement with other reports.<sup>2</sup>

### References:

- 1 M. K. Mohanta, Dimple, A. Rawat, N. Jena, R. Ahammed and A. D. Sarkar, *Physica E: Low-dimensional Systems and Nanostructures*, 2020, **124**, 114222.
- 2 J. Shi, C. Han, X. Wang and S. Yun, *Physica B: Condensed Matter*, 2019, **574**, 311634.
